# Supplementary material for: Stable and Oriented Liquid Crystal Droplets Stabilized by Imidazolium Ionic Liquids
Source: MDPI journal article supplement (doi:10.3390/molecules26196044), 2021-10-05
Supplement: s1 [file s1]

## Electronic Supplementary Information

# Stable and Oriented Liquid Crystal Droplets Stabilized by Imidazolium Ionic Liquids

**Efthymia Ramou<sup>1,2Ψ</sup>, Guilherme Rebordão<sup>1,2Ψ</sup>, Susana I. C. J. Palma<sup>1,2Ψ</sup> and Ana C. A. Roque<sup>1,2\*</sup>**

<sup>1</sup> Associate Laboratory i4HB- Institute for Health and Bioeconomy, School of Science and Technology, NOVA University Lisbon, 2819-516 Caparica, Portugal

<sup>2</sup> UCIBIO – Applied Molecular Biosciences Unit, Department of Chemistry, School of Science and Technology, NOVA University Lisbon, 2819-516 Caparica, Portugal

\* Correspondence: [cecilia.roque@fct.unl.pt](mailto:cecilia.roque@fct.unl.pt)

Ψ Authors contributed equally

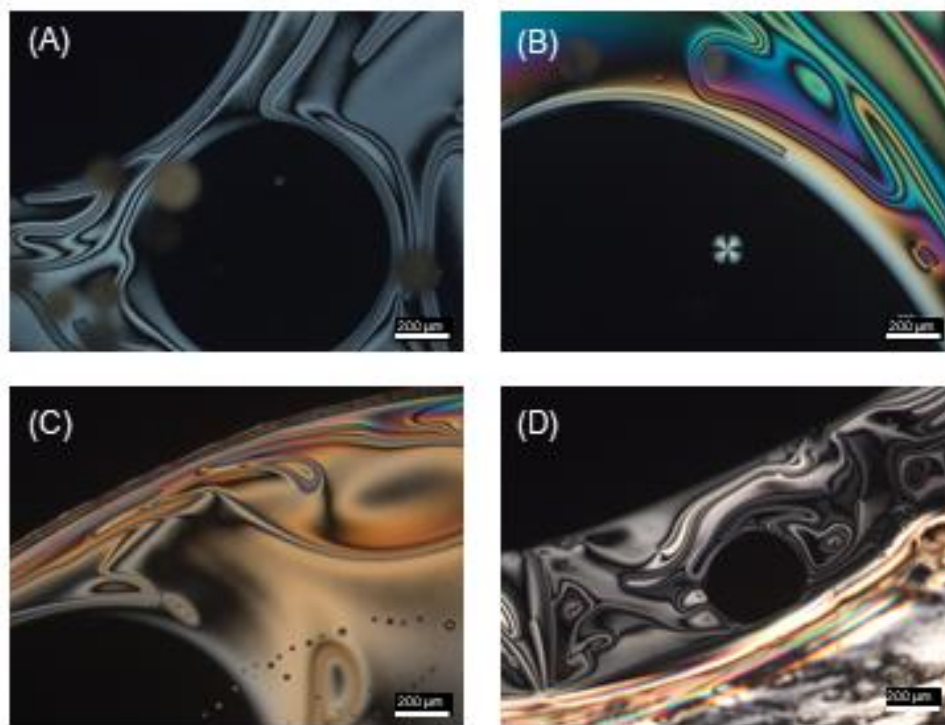

**Figure S1.** POM images showing separation of phases when using (A)  $[\text{C}_2\text{MIM}][\text{Cl}]$ , (B)  $[\text{C}_4\text{MIM}][\text{DCA}]$ , (C)  $[\text{C}_4\text{MIM}][\text{Cl}]$ , (D)  $[\text{C}_6\text{MIM}][\text{Cl}]$  for the disperse phase in the microfluidics experiments.

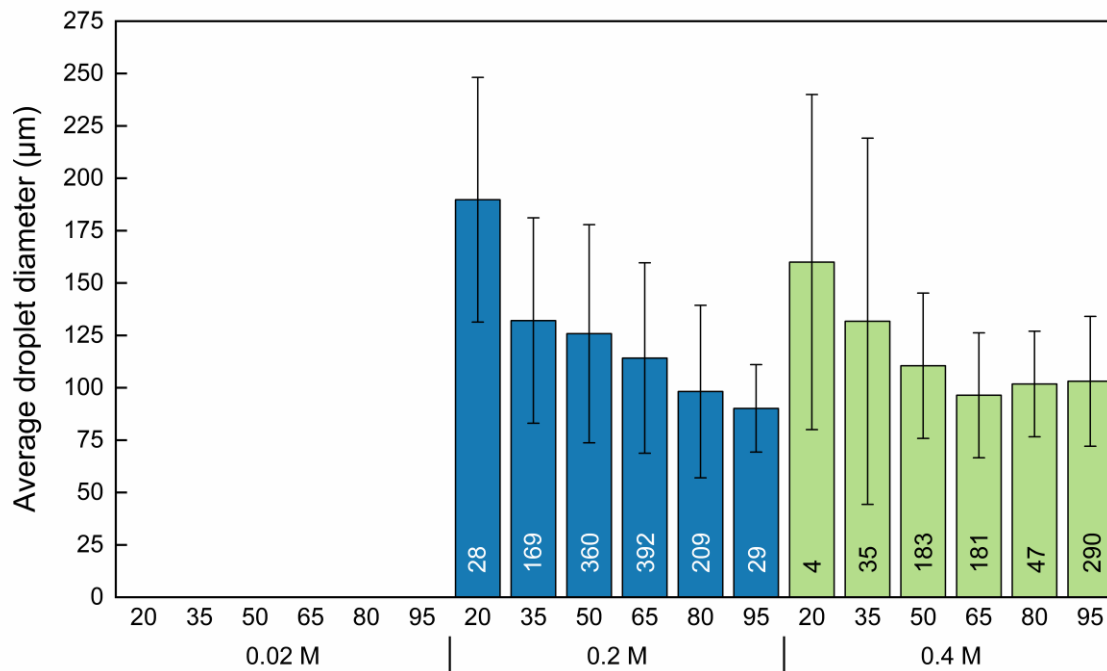

**Figure S2.** Size comparison between droplets formed with [CsMIM][Cl] at concentrations 0.02 M, 0.2 M, and 0.4 M, respectively. On the x axis the different tested flow ratios are represented. The number of analyzed droplets is shown inside the respective bars. No droplets were produced when using [CsMIM][Cl] at a 0.02 M concentration.

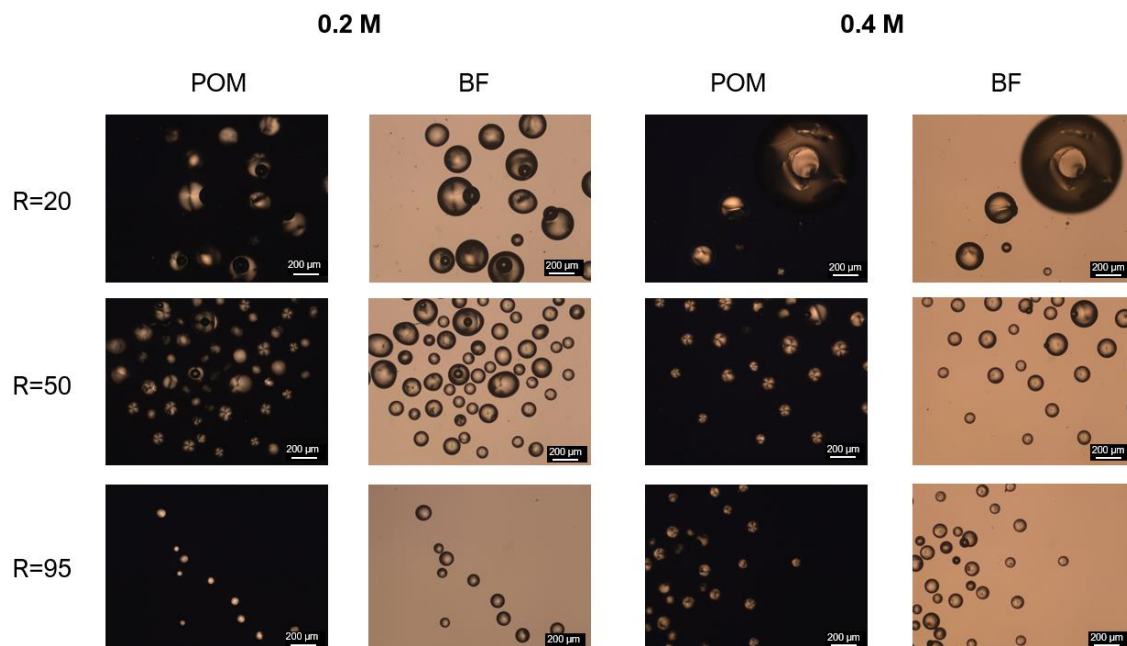

**Figure S3.** POM and BF images of droplets formed using  $[\text{C}_8\text{MIM}][\text{Cl}]$  at concentrations 0.2 M and 0.4 M, respectively. For clarity reasons, only 3 different Rs are displayed here: 20, 50, and 95.

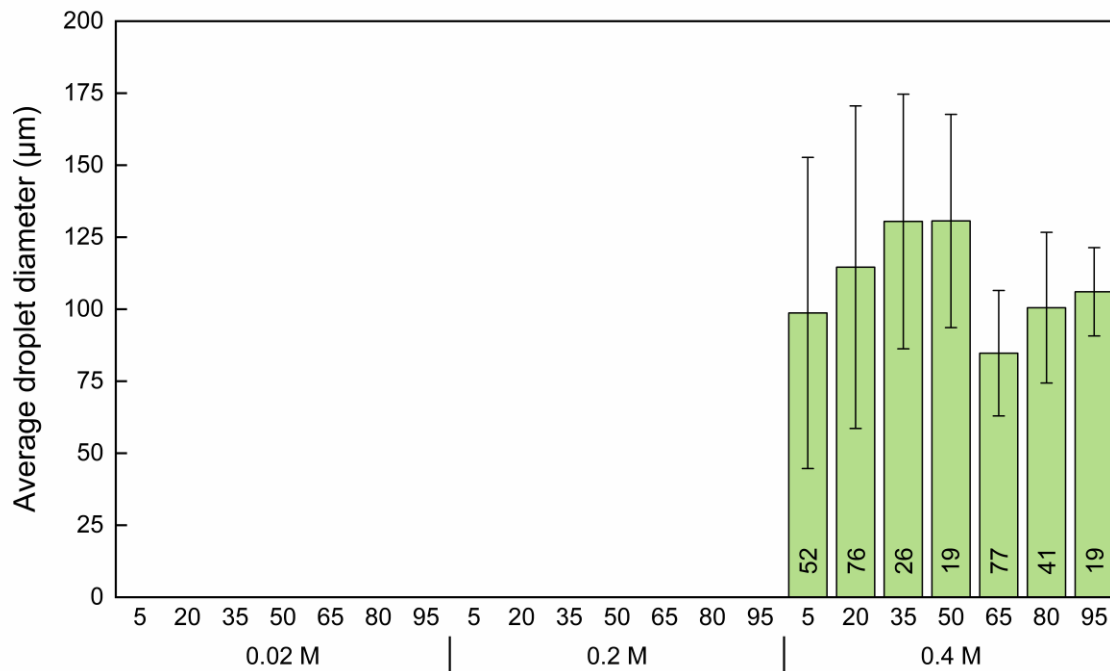

**Figure S4.** Comparison between droplets formed using  $[C_{10}MIM][Cl]$  at concentrations 0.02 M, 0.2 M, and 0.4 M, respectively. On the x axis the different tested flow ratios are represented. No droplets were produced when using concentrations 0.02 M and 0.2 M. The number of analyzed droplets is shown inside the respective bars.

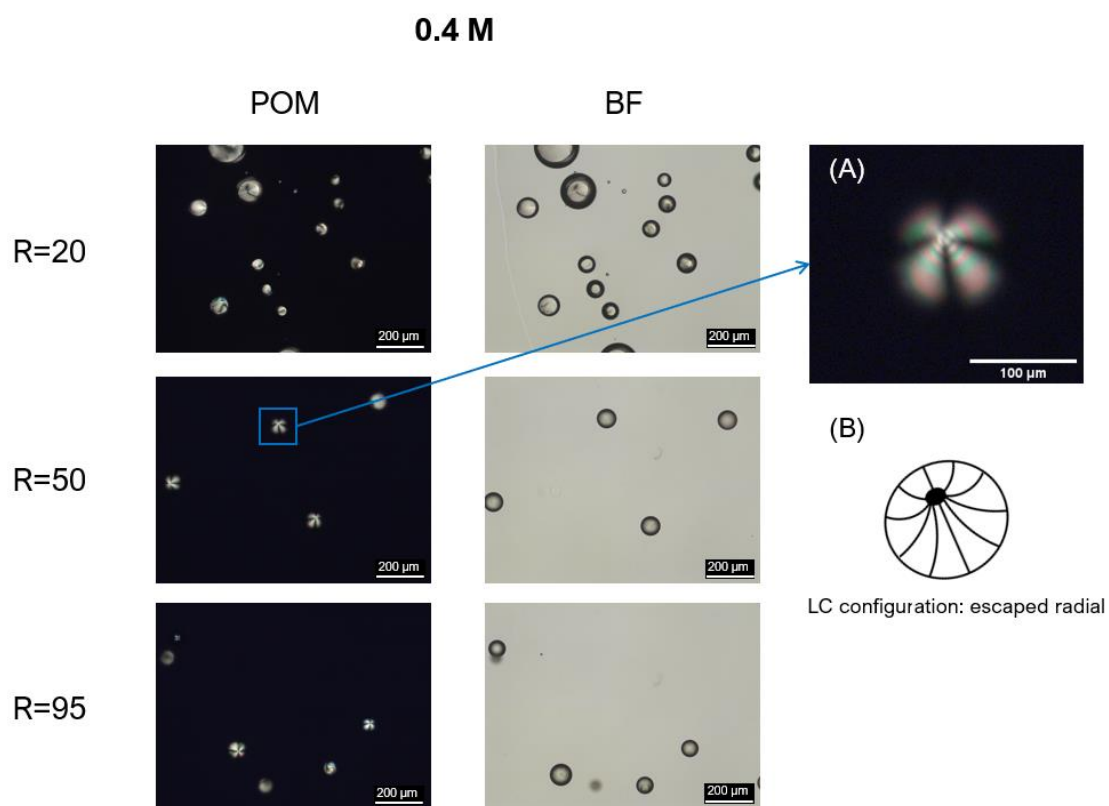

**Figure S5.** POM and BF images of droplets formed using  $[\text{C}_{10}\text{MIM}][\text{Cl}]$  at concentration 0.4 M. For clarity reasons, only 3 different Rs are displayed: 20, 50, and 95. (A) Droplet close-up. (B) Illustration showing the escaped radial configuration of the droplet. [1]

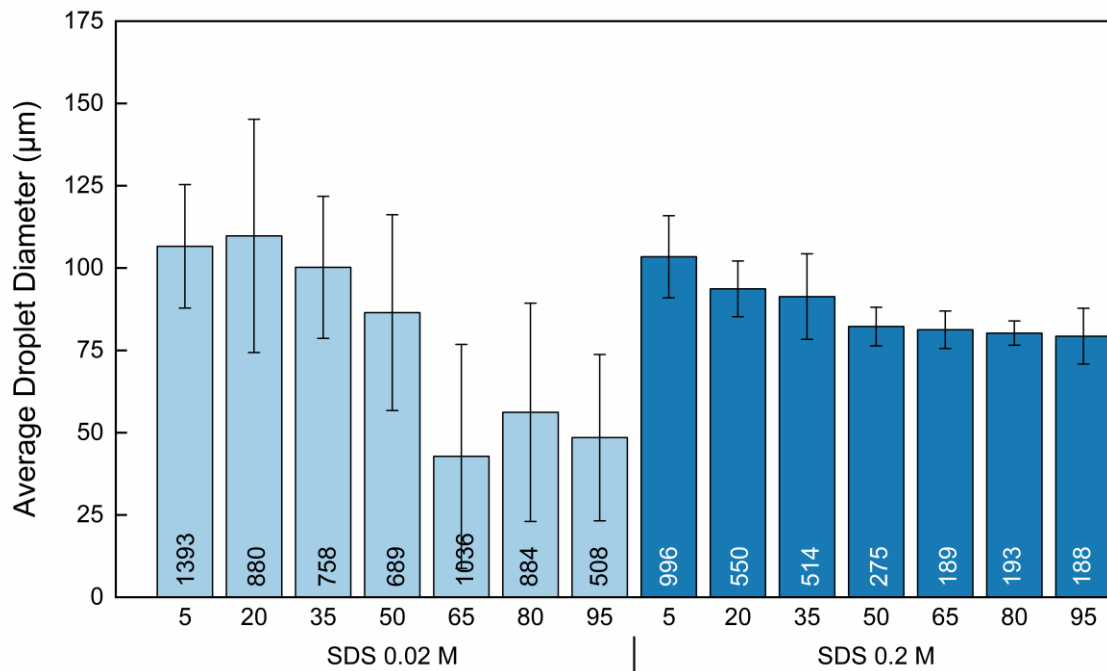

**Figure S6.** Size comparison between droplets formed using SDS at concentrations 0.02 M and 0.2 M, respectively. On the x axis the different tested flow ratios are represented. The number of analyzed droplets is shown inside the respective bars.

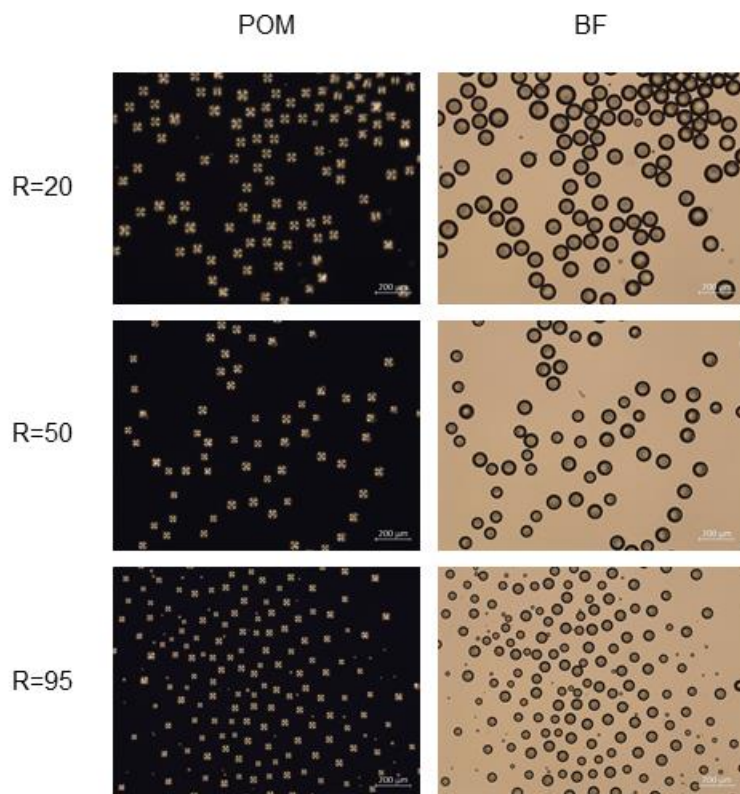

**Figure S7.** POM and BF images of droplets formed using SDS at concentration 0.02 M. For clarity reasons, only 3 different Rs are displayed: 20, 50, and 95.

## References

1. Gupta, J.K.; Zimmerman, J.S.; De Pablo, J.J.; Caruso, F.; Abbott, N.L. Characterization of adsorbate-induced ordering transitions of liquid crystals within monodisperse droplets. *Langmuir* **2009**, 25, 9016–9024, doi:10.1021/la900786b.
